# Supplementary material for: Coocclusion of Helicoverpa armigera Single Nucleopolyhedrovirus (HearSNPV) and Helicoverpa armigera Multiple Nucleopolyhedrovirus (HearMNPV): Pathogenicity and Stability in Homologous and Heterologous Hosts
Source: MDPI journal article supplement (doi:10.3390/v14040687), 2022-03-26
Supplement: s1 [file s1]

Supplemental figure: S1. Logarithm of copy number of HearSNPV and HearMNPV genomes determined by qPCR of progeny occlusion bodies.

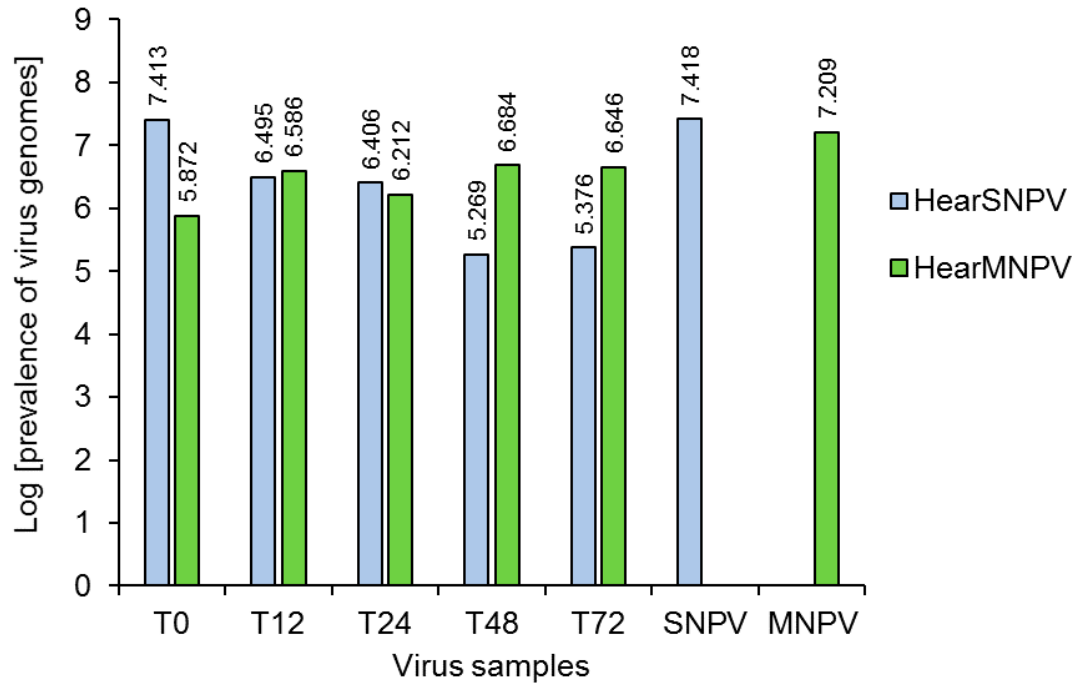

**Figure S1.** Logarithm of copy number of HearSNPV (blue columns) and HearMNPV (green columns) genomes determined by qPCR of progeny occlusion bodies obtained after initial infection of *Helicoverpa armigera* larvae with an LC<sub>90</sub> concentration of HearMNPV followed at intervals of 0 h (T0), 12 h (T12), 24 h (T24), 48 h (T48) and 72 h (T72) by superinfection with an LC<sub>90</sub> concentration of HearSNPV occlusion bodies. Values above columns indicate logarithms of the prevalence of virus genomes (copy number).
